# Supplementary material for: Hybrid sequencing and map finding (HySeMaFi): optional strategies for extensively deciphering gene splicing and expression in organisms without reference genome
Source: PubMed Central journal article supplement (PMC5341560; doi:10.1038/srep43793), 2017-03-08
Supplement: srep43793-s1.pdf [file srep43793-s1.pdf]

# Hybrid sequencing and map finding (HySeMaFi): optional strategies for extensively deciphering gene splicing and expression in organisms without reference genome

Guogui Ning<sup>\*1</sup>, Xu Cheng<sup>2</sup>, Ping Luo<sup>1</sup>, Fan Liang<sup>3</sup>, Zhen Wang<sup>1</sup>, Guoliang Yu<sup>1</sup>, Xin Li<sup>1</sup>, Depeng Wang<sup>3</sup>, Manzhu Bao<sup>\*1</sup>

## Address:

<sup>1</sup>Key laboratory of Horticultural Plant Biology, Ministry of Education,  
College of Horticulture and Forestry Sciences,  
Huazhong Agricultural University, Wuhan, P. R. China

<sup>2</sup>Medical Research Institute, School of Medicine, Wuhan University, Wuhan, P. R. China

<sup>3</sup>Nextomics Biosciences Co., Ltd., Wuhan, Hubei, China

\*Author for correspondence: **Guogui Ning & Manzhu Bao**

E-mail: [ggning@mail.hzau.edu.cn](mailto:ggning@mail.hzau.edu.cn); [mzbao@mail.hzau.edu.cn](mailto:mzbao@mail.hzau.edu.cn)

Fax: +86 27 8728 2010

Phone: +86 27 8728 6928

## supplementary information

**Figure S1.** Strategy to decipher the genes splicing and expression in the transcriptome of non model organism.

**Figure S2.** Schedule to the mapping strategy between PacBio corrected long reads (Left) and contigs assembled from SGS (Right) based on isoforms from one theoretical gene.

**Figure S3.** Distribution of extended fragments length in Miseq analysis.

**Figure S4.** Number distribution at varied Read of insert Length and Quality respectively.

**Figure S5.** Number distribution at varied Read Length of Full-length Non-Chimeric Reads.

**Figure S6.** Characterizing the root, flower, stem and leaf transcriptome and illustrating different expressing genes specific or not specific to root by short reads using traditional RNA-Seq methods.

(A) The higher expression genes specific to roots; (B) Heap map shows the expression of 896 genes; (C) The lower expression genes specific to roots; (D) Heap map shows the expression of 666 genes; (E-F) Expression analysis to the mapping derived transcripts between SGS and TGS. Note: Red high expression, blue low expression, left cluster gene tree.

**Table S1.** Summary of sample short reads after clearing in SGS sequencing from Petunia.

**Table S2.** Summary of transcripts assembled from short reads data by trinity with different parameters from Petunia.

**Table S3.** Summary of sample Miseq reads from Miseq sequencing from Petunia.

**Table S4.** Summary of processed sample Miseq reads from Miseq sequencing from Petunia.

**Table S5.** Summary of sample short reads after clearing in SGS sequencing from Arabidopsis.

**Table S6.** Summary of transcripts assembled from short reads data by trinity with different parameters from Arabidopsis.

**Table S7.** Summary of sample reads of insert in SMRT sequencing from Petunia.

**Table S8.** Classify of reads of insert in SMART sequencing from Petunia.

**Table S9.** The identified genes that displayed at least three alternative splicing patterns.

**Table S10.** The majority of genes, with the homologous genes in specific species, show high expression in root determined by using the corrected PacBio long reads as the reference.

**Table S11.** The majority of genes, with the homologous genes in specific species, low expression in root determined by using the corrected PacBio long reads as the reference.

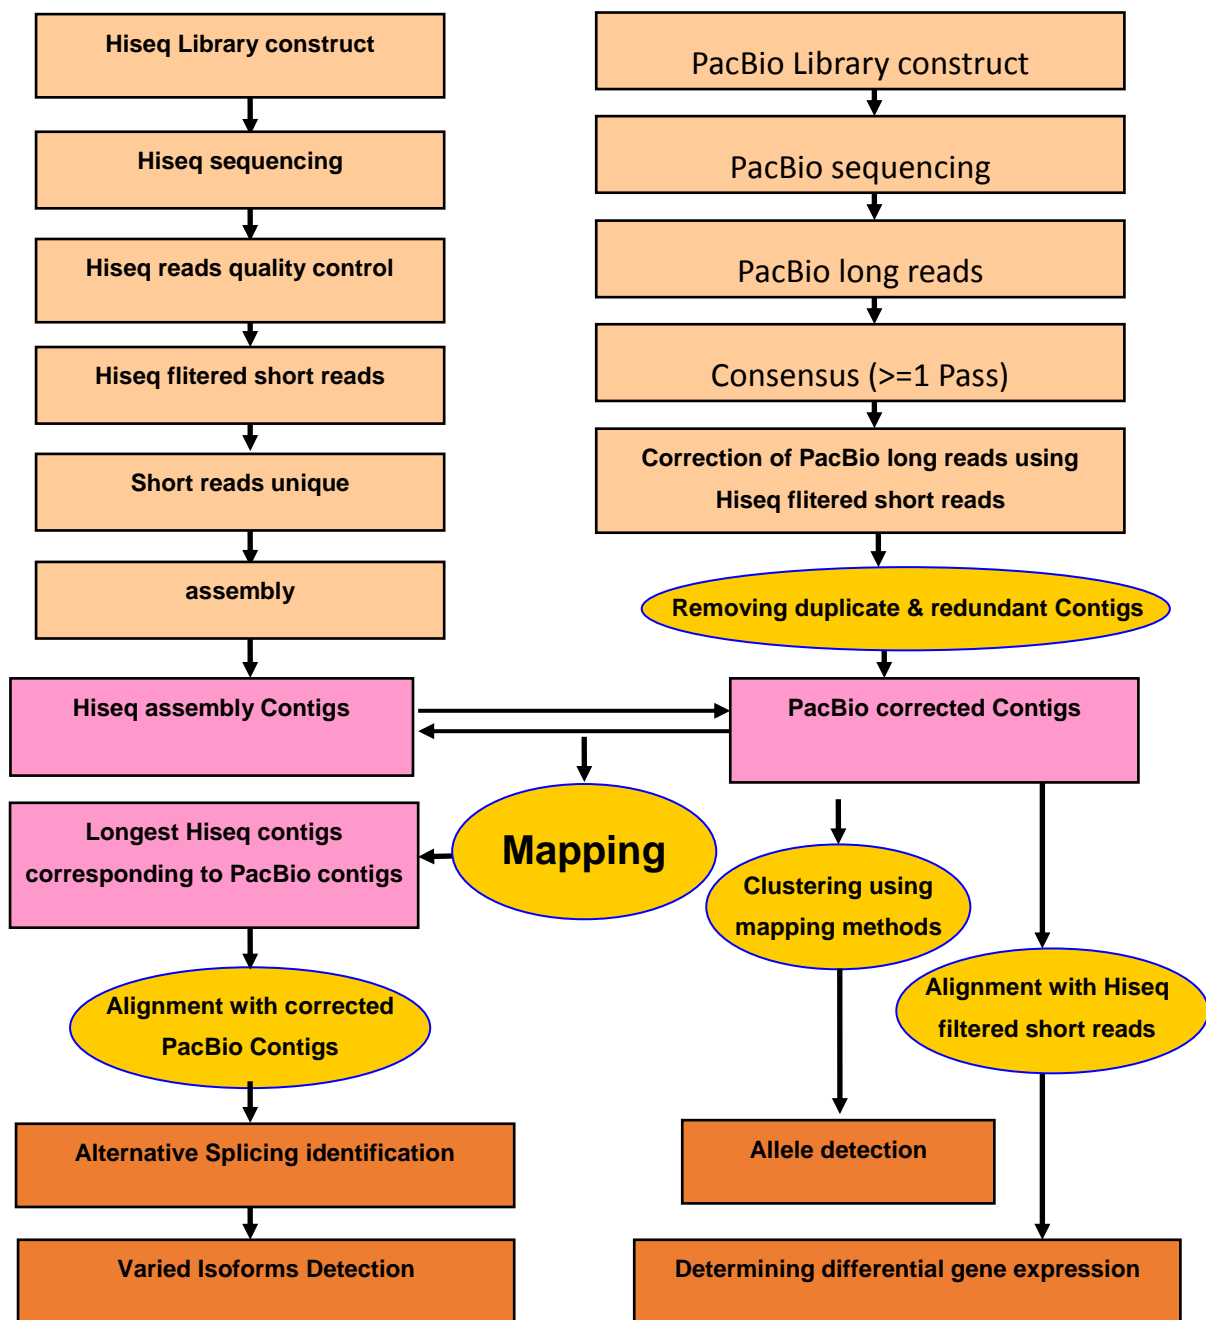

Figure S1. Strategy to decipher the genes splicing and expression in the transcriptome of non model organism.

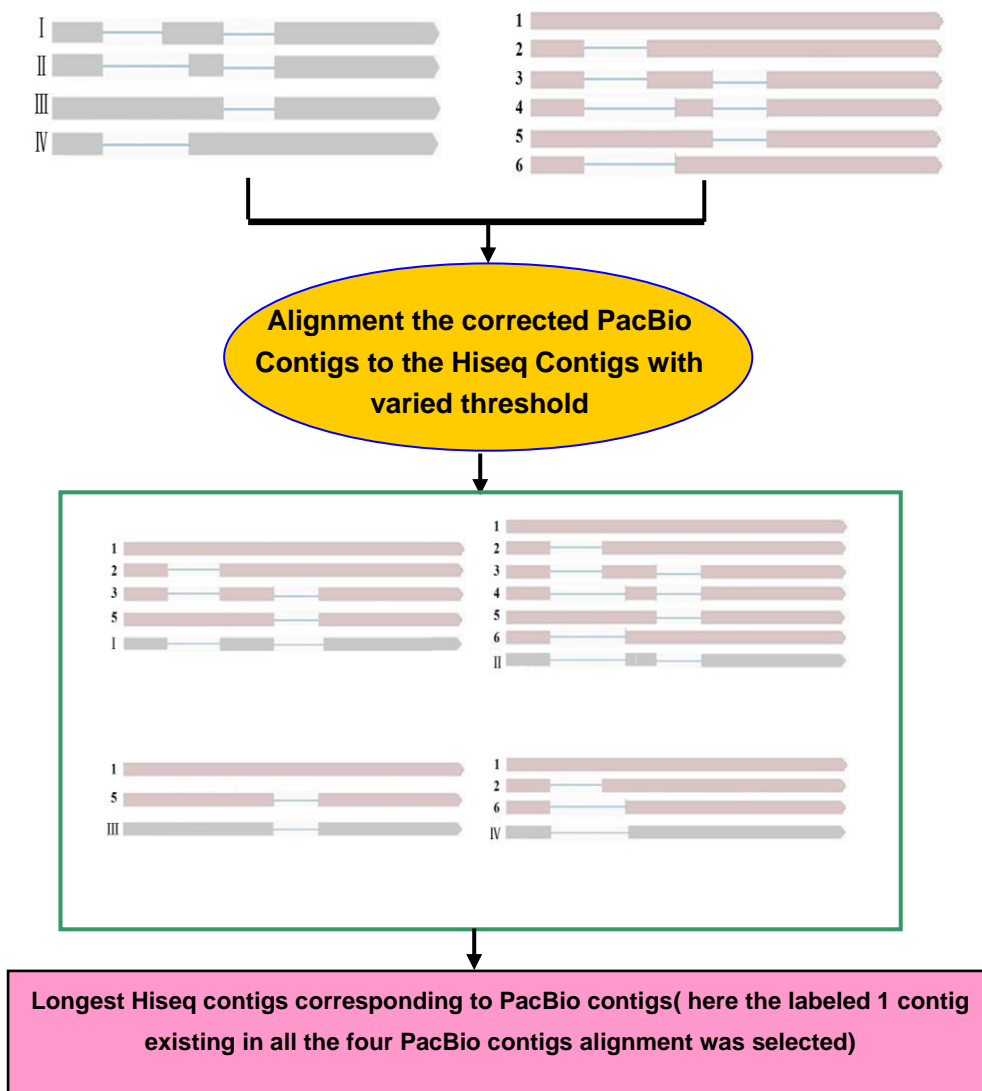

Figure S2. Schedule to the mapping strategy between PacBio corrected long reads (Left) and contigs assembled from SGS (Right) based on isoforms from one theoretical gene.

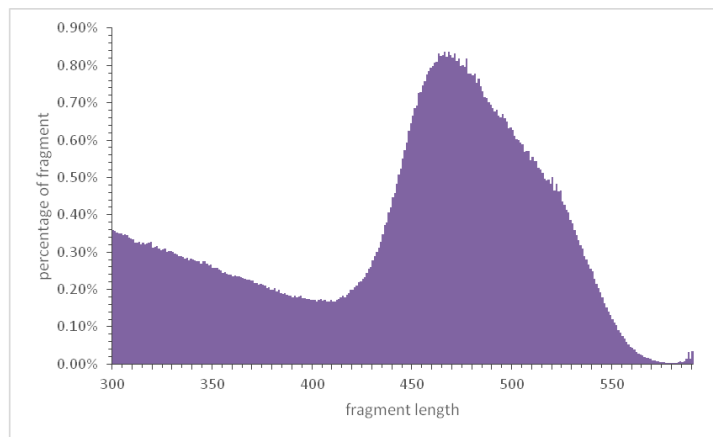

Figure S3. Distribution of extended fragments length in Miseq analysis.

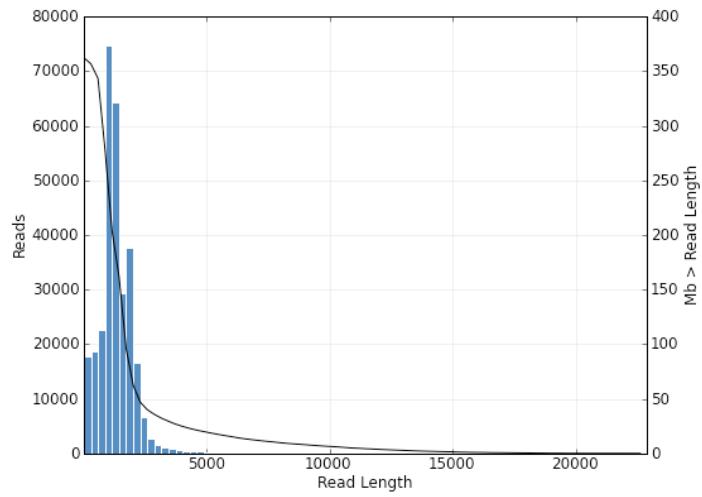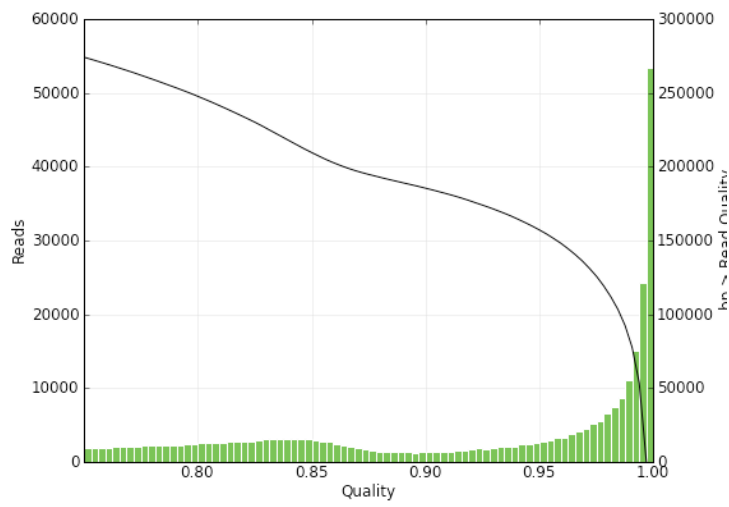

Figure S4. Number distribution at varied Read of insert Length and Quality respectively.

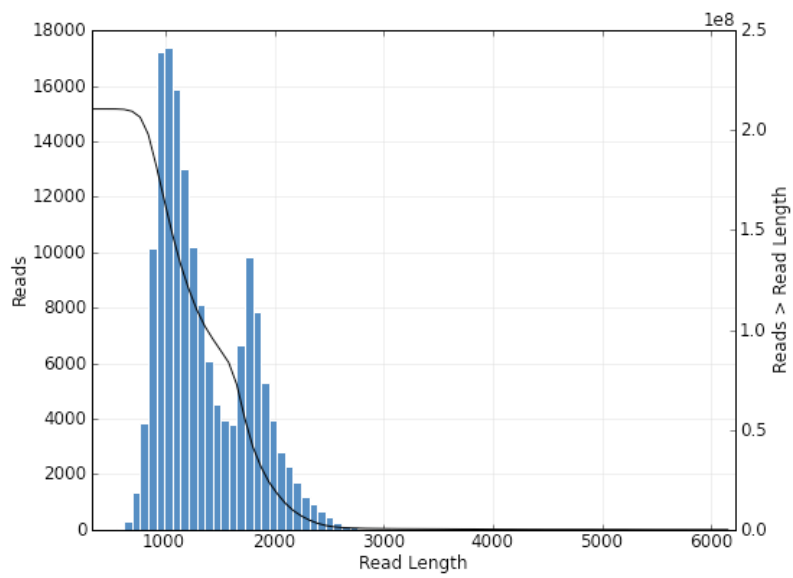

Figure S5. Number distribution at varied Read Length of Full-length Non-Chimeric Reads.

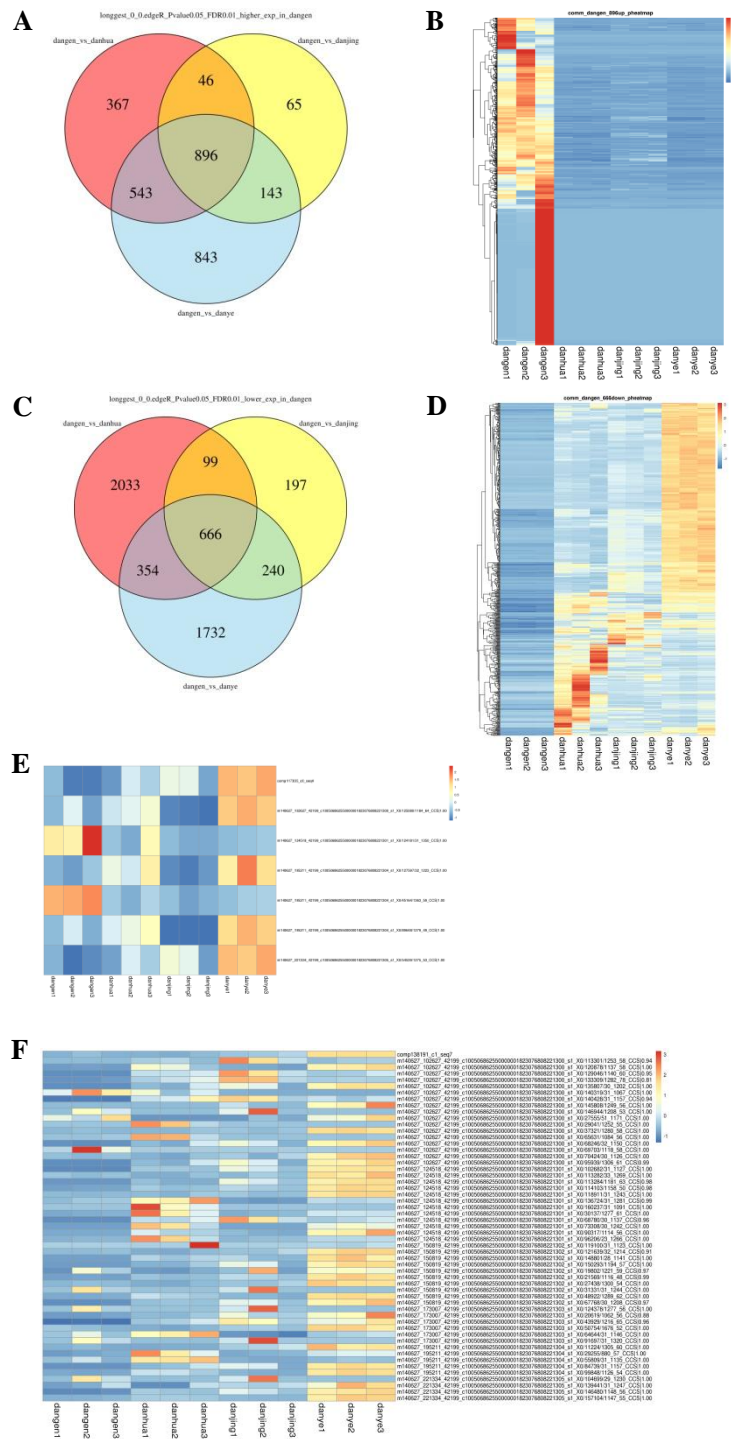

Figure S6. Characterizing the root, flower, stem and leaf transcriptome and illustrating different expressing genes specific or not specific to root by short reads using traditional RNA-Seq methods. (A) The higher expression genes specific to roots; (B) Heap map shows the expression of 896 genes; (C) The lower expression genes specific to roots; (D) Heap map shows the expression of 666 genes; (E-F) Expression analysis to the mapping derived transcripts between SGS and TGS. Note: Red high expression, blue low expression, left cluster gene tree.



**Table S1. Summary of sample short reads after clearing in SGS sequencing from Petunia.**

| <b>Sample</b> | <b>Read Length</b> | <b>Clean reads</b> | <b>Clean Bases</b> | <b>Q20 Rate(%)</b> | <b>Q30 Rate(%)</b> |
|---------------|--------------------|--------------------|--------------------|--------------------|--------------------|
| dangen1       | 100                | 83,536,154         | 8,353,615,400      | 0.95               | 0.90               |
| dangen2       | 100                | 79,683,542         | 7,968,354,200      | 0.95               | 0.90               |
| dangen3       | 100                | 63,482,438         | 6,348,243,800      | 0.95               | 0.90               |
| danhua1       | 100                | 80,752,172         | 8,075,217,200      | 0.95               | 0.90               |
| danhua2       | 100                | 81,043,876         | 8,104,387,600      | 0.95               | 0.90               |
| danhua3       | 100                | 87,797,476         | 8,779,747,600      | 0.95               | 0.90               |
| danjing1      | 100                | 74,661,844         | 7,466,184,400      | 0.94               | 0.89               |
| danjing2      | 100                | 74,147,972         | 7,414,797,200      | 0.95               | 0.90               |
| danjing3      | 100                | 81,139,600         | 8,113,960,000      | 0.95               | 0.90               |
| danye1        | 100                | 78,068,476         | 7,806,847,600      | 0.95               | 0.90               |
| danye2        | 100                | 81,918,232         | 8,191,823,200      | 0.95               | 0.90               |
| danye3        | 100                | 79,269,758         | 7,926,975,800      | 0.95               | 0.90               |

**Table S2. Summary of transcripts assembled from short reads data by trinity with different parameters from Petunia.**

| <b>Sample</b>               | <b>Total length</b> | <b>Total genes</b> | <b>Average length</b> | <b>N50 length</b> | <b>Max length</b> | <b>Min length</b> |
|-----------------------------|---------------------|--------------------|-----------------------|-------------------|-------------------|-------------------|
| <b>Trinity lower para</b>   | 809,209,091         | 490,981            | 1,648.15              | 2,930             | 37,250            | 201               |
| <b>Trinity default para</b> | 575,798,199         | 412,941            | 1,394.38              | 2,579             | 19,688            | 201               |
| <b>Trinity lower para</b>   | 337,981,378         | 301,386            | 1,121.42              | 2,203             | 37,250            | 201               |

**Table S3. Summary of sample Miseq reads from Miseq sequencing from Petunia.**

| <b>Reads</b> | <b>Length</b> | <b># of reads</b> | <b># of reads with N</b> | <b># of bases</b> | <b># of HQ bases</b> | <b>HQ bases rate(%)</b> |
|--------------|---------------|-------------------|--------------------------|-------------------|----------------------|-------------------------|
| Raw R1       | 300           | 10,354,752        | 826                      | 3,106,425,600     | 2,943,860,296        | 94.77                   |
| Raw R2       | 300           | 10,354,752        | 249                      | 3,106,425,600     | 2,793,606,115        | 89.93                   |
| Clean R1     | 300           | 10,076,596        | 474                      | 3,022,978,800     | 2,879,895,198        | 95.27                   |
| Clean R2     | 300           | 10,076,596        | 31                       | 3,022,978,800     | 2,735,718,133        | 90.50                   |

**Table S4. Summary of processed sample Miseq reads from Miseq sequencing from Petunia.**

| <b>type</b>        | <b># of Reads</b> | <b>BaseNumber</b> | <b>Average Length</b> | <b>Average Q</b> | <b>Q20</b> |
|--------------------|-------------------|-------------------|-----------------------|------------------|------------|
| R1 reads           | 5,758,294         | 1,727,488,200     | 300                   | 64.7             | 0.80       |
| R2 reads           | 5,758,294         | 1,727,488,200     | 300                   | 62.19            | 0.73       |
| Extended fragments | 4,596,458         | 2,041,011,806     | 444                   | 69.24            | 0.97       |

**Table S5. Summary of sample short reads after clearing in SGS sequencing from Arabidopsis.**

| Sample     | Clean Read Number | Clean Base Number | Q30 Rate |
|------------|-------------------|-------------------|----------|
| SRR2898686 | 36,146,222        | 3,650,296,892     | 95.69%   |
| SRR2898687 | 40,746,426        | 4,114,983,071     | 95.79%   |
| SRR2898688 | 38,886,698        | 3,927,152,800     | 95.65%   |

**Table S6. Summary of transcripts assembled from short reads data by trinity with different parameters from Arabidopsis.**

| Sample               | Total length | Total genes | Average length | N50 length | Max length | Min length |
|----------------------|--------------|-------------|----------------|------------|------------|------------|
| Trinity lower para   | 55,673,892   | 44,934      | 1,239          | 2,007      | 16,568     | 201        |
| Trinity default para | 35,516,195   | 44,914      | 791            | 1,121      | 8,166      | 200        |

**Table S7. Summary of sample reads of insert in SMRT sequencing from Petunia.**

| <b>Sample</b> | <b>Reads Of Insert</b> | <b>Read Bases Of Insert</b> | <b>Mean Read Length Of Insert</b> | <b>Mean Read Quality Of Insert</b> | <b>Mean Number Of Passes</b> |
|---------------|------------------------|-----------------------------|-----------------------------------|------------------------------------|------------------------------|
| A01_1         | 51,204                 | 58,620,034                  | 1,144                             | 0.9111                             | 5.87                         |
| A01_2         | 49,341                 | 57,266,291                  | 1,160                             | 0.9318                             | 7.36                         |
| A01_3         | 46,767                 | 53,633,722                  | 1,146                             | 0.9307                             | 7.33                         |
| B01_1         | 49,107                 | 75,009,056                  | 1,527                             | 0.9179                             | 6.00                         |
| B01_2         | 49,707                 | 76,344,222                  | 1,535                             | 0.9178                             | 5.99                         |
| B01_3         | 53,416                 | 84,288,879                  | 1,577                             | 0.9243                             | 6.32                         |

**Table S8. Classify of reads of insert in SMART sequencing from Petunia.**

|                                              | Value   | Rate   |
|----------------------------------------------|---------|--------|
| # of reads of insert                         | 299,542 | -      |
| # of five primer reads                       | 188,001 | 62.76% |
| # of three primer reads                      | 201,966 | 67.43% |
| # of poly-A reads                            | 201,593 | 67.30% |
| # of filtered short reads                    | 18,821  | 6.28%  |
| # of non-full-length reads                   | 119,993 | 40.06% |
| # of full-length reads                       | 160,728 | 53.66% |
| # of full-length non-chimeric reads          | 160,293 | 53.51% |
| # of chimeric reads                          | 435     | 0.15%  |
| Average full-length non-chimeric read length | 1,350   | 0.45%  |
